# Supplementary material for: Induction of p53-independent apoptosis by ectopic expression of HOXA5 in human liposarcomas
Source: PubMed Central journal article supplement (PMC4518222; doi:10.1038/srep12580), 2015-07-29
Supplement: srep12580-s1.pdf [file srep12580-s1.pdf]

## Supplementary Information

### **Induction of p53-independent apoptosis by ectopic expression of HOXA5 in human liposarcomas**

Dhong Hyun Lee<sup>1,\*</sup>, Charles Forscher<sup>1</sup>, Dolores Di Vizio<sup>2,3</sup>, and H. Phillip Koeffler<sup>1,4</sup>.

<sup>1</sup>Division of Hematology and Oncology, <sup>2</sup>Division of Cancer Biology and Therapeutics, Departments of Surgery, Biomedical Sciences and Pathology and Laboratory Medicine, Samuel Oschin Comprehensive Cancer Institute, Cedars-Sinai Medical Center, Los Angeles, CA. <sup>3</sup>The Urological Diseases Research Center; Boston Children's Hospital, Boston, MA, Department of Surgery, Harvard Medical School, Boston, MA. <sup>4</sup>National Cancer Institute and Cancer Science Institute, National University of Singapore, Singapore.

#### **\* Correspondence:**

Dhong Hyun Lee, Ph. D.

Division of Hematology and Oncology, Cedars-Sinai Medical Center, UCLA School of Medicine, 8700 Beverly Blvd, D5022, Los Angeles, CA 90048, USA; Phone: +1-310-423-7736; Fax: +1-310-423-0225; E-mail: [hiromasa@ucla.edu](mailto:hiromasa@ucla.edu)

## Supplementary Figure S1

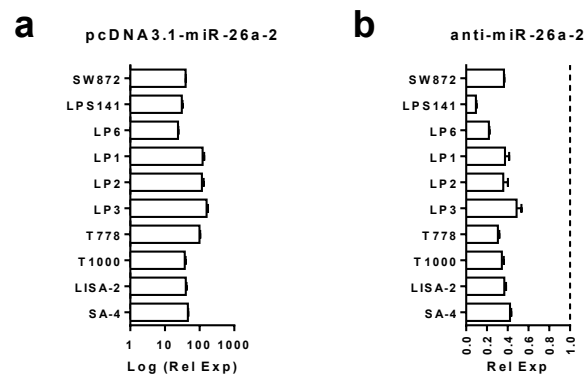

**Supplementary Figure S1. Validation of miR-26a-2 modulation in LPS cells.** (a) For the overexpression study shown in Figure 1e, LPS cells were transfected with either miR-26a-2 expression vector or empty vector control (EV). After 48 h of transfection, cells were harvested and subjected to qRT-PCR. Data represent average relative miR-26a-2 expression  $\pm$  standard deviation (SD, error bars). Dashed line indicates the expression level of miR-26a-2 in cells with EV. (b) For the inhibition study shown in Figure 1f, LPS cells were transfected with either anti-miR26a-2 or scrambled oligos (SCR). After 48 h, cells were harvested and subjected to qRT-PCR. Dashed line indicates the expression level of miR-26a-2 in cells with SCR.

## Supplementary Figure S2

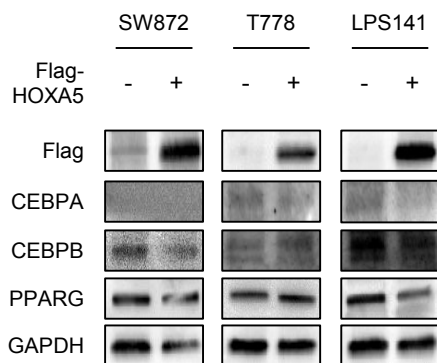

**Supplementary Figure S2. Changes in the protein levels of key adipocyte differentiation proteins upon HOXA5 overexpression in LPS cells.** LPS cells were transfected with either HOXA5 expression vector or empty vector control. Cells were harvested 24 h after transfection and subjected to Western blot analysis. Representative images are shown. GAPDH was used as a loading control.

## Supplementary Figure S3

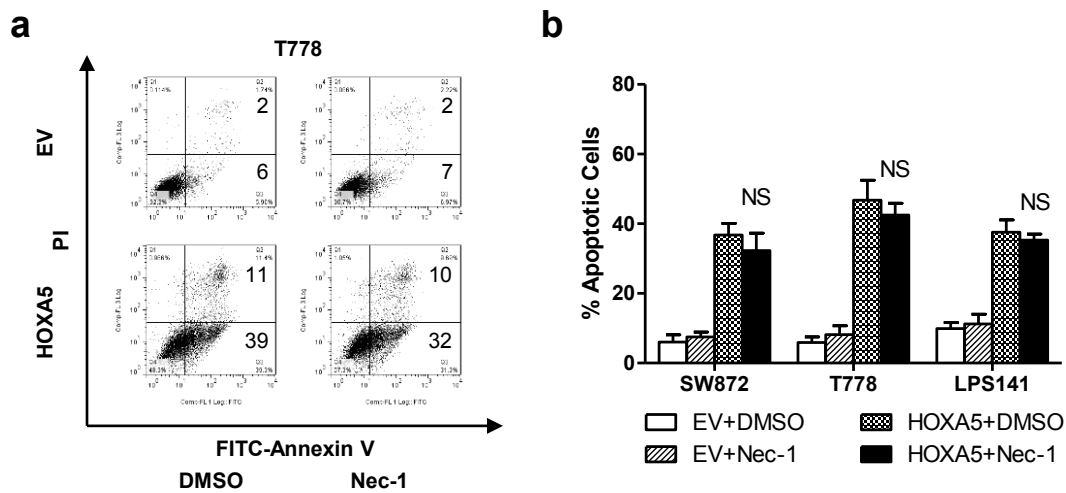

**Supplementary Figure S3. Effect of necrostatin-1 (Nec-1) on the HOXA5-induced apoptosis in LPS cells.** LPS cells were transfected with either HOXA5 expression vector or empty vector control (EV), and subsequently treated with 5  $\mu$ M Nec-1 12h after transfection. Cells were further incubated for an additional 12h, and subjected to apoptosis assay. (a) Representative apoptosis assay results of T778 cells. Numbers indicate the percentage of early-apoptotic (bottom) and late-apoptotic (top) cells. (b) Summary of apoptosis assay results. Data represent % apoptotic cells  $\pm$  standard deviation (SD, error bars). NS = not significant.

## Supplementary Figure S4

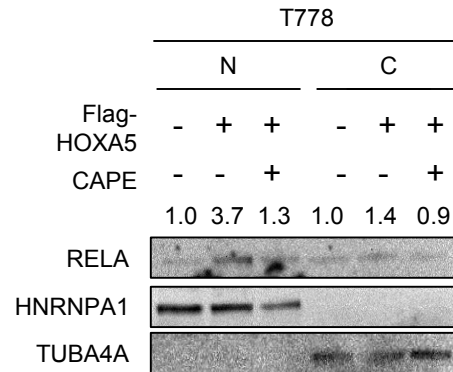

**Supplementary Figure S4. Validation of caffeic acid phenethyl ether (CAPE) activity in LPS cells.** T778 cells were transfected with either HOXA5 expression vector or empty vector control. Cells were treated with 25  $\mu\text{g/ml}$  CAPE 9 h after transfection, incubated for an additional 15 h, and subjected to Western blotting. Representative images are shown. HNRNPA1 and TUBA4A ( $\alpha$ -tubulin) were used as loading control for nuclear (N) and cytoplasmic (C) fraction of cells, respectively. Numbers indicate relative band intensity of RELA normalized to the intensity of the genes in control (1.0) for each fraction.

## Supplementary Figure S5

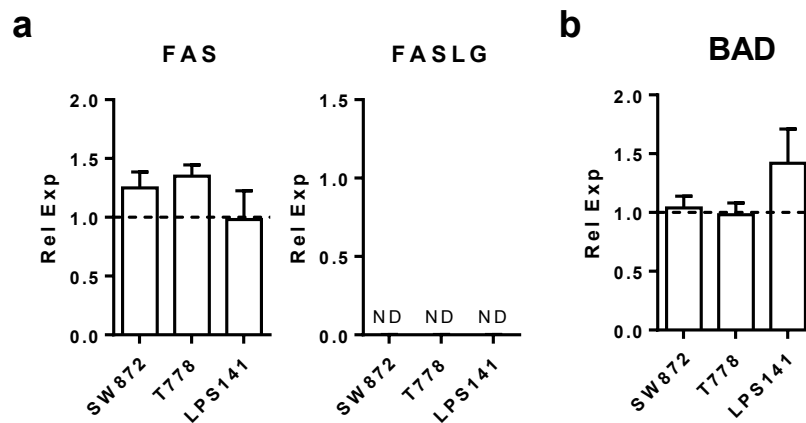

**Supplementary Figure S5. Effect of HOXA5 overexpression on the transcription of selected NF $\kappa$ B target genes in LPS cells.** SW872, T778, LPS141 cells were transfected with either HOXA5 expression vector or empty vector control (EV). 24h after transfection, cells were harvested and subjected to qRT-PCR (same condition as shown in Figures 4f and 4g). Primer pairs are shown in Supplementary Table S2. Graphs show changes in the mRNA expression level of selected pro-apoptotic (panel A) and anti-apoptotic (panel B) NF $\kappa$ B target genes upon HOXA5 overexpression in LPS cells. Dashed line indicates the expression level of each gene in cells with EV. Data represent relative mRNA expression  $\pm$  standard deviation (SD, error bars). ND = no detection.

## Supplementary Figure S6

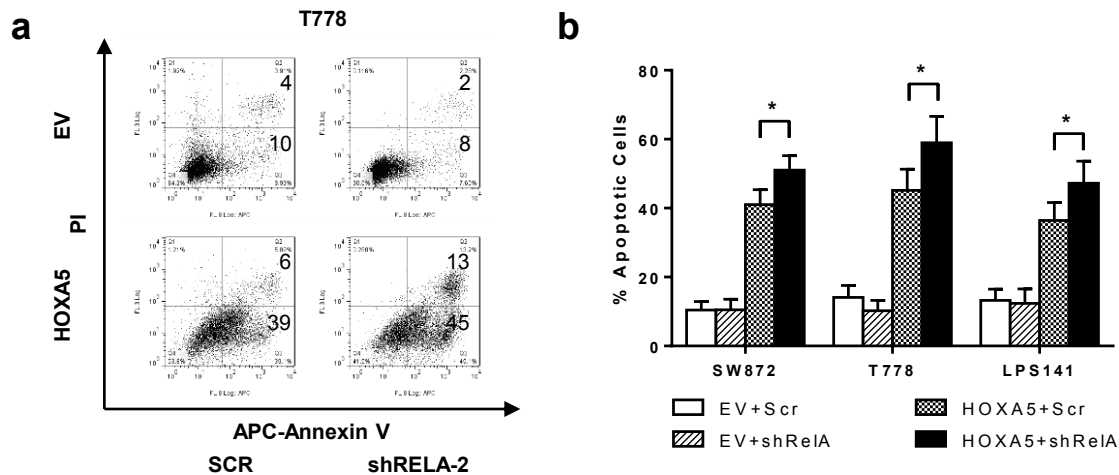

**Supplementary Figure S6. Effect of RELA inhibition on the HOXA5-induced apoptosis in T778 cells.** T778 cells stably transfected with either shRNA vector against RELA (shRELA-2) or scrambled control (SCR), and were subsequently transfected with either HOXA5 expression vector (HOXA5) or empty vector control (EV). Cells were incubated 24 h and subjected to apoptosis assay analysis. The other shRELA vector (shRELA-1) was cytotoxic and was excluded from the study. (A) Representative apoptosis assay results. Numbers indicate the percentage of early-apoptotic (bottom) and late-apoptotic (top) cells. (B) Summary of apoptosis assay results. Data represent % apoptotic cells  $\pm$  standard deviation (SD, error bars). Asterisk (\*) indicates p-value less than 0.05 by t-test.

**Supplementary Table S1. Human liposarcoma (LPS) cell lines used in the study**

| <b>Name</b> | <b>LPS subtype</b>    | <b>Source</b>             | <b>TP53 status</b>       | <b>MDM2 status</b> |
|-------------|-----------------------|---------------------------|--------------------------|--------------------|
| SW872       | Undifferentiated      | ATCC <sup>c</sup>         | Mutant<br>T356A (pI119N) | WT                 |
| LPS141      | DDLPS <sup>a</sup>    | Dr. Fletcher <sup>d</sup> | WT <sup>h</sup>          | Overexpressed      |
| LPS6        | DDLPS                 | Dr. Fletcher              | WT                       | Overexpressed      |
| LPS1        | DDLPS                 | Dr. Wu <sup>e</sup>       | WT                       | Overexpressed      |
| LPS2        | DDLPS                 | Dr. Wu                    | WT                       | Overexpressed      |
| LPS3        | DDLPS                 | Dr. Wu                    | WT                       | Overexpressed      |
| T778        | WDLPS <sup>b</sup>    | Dr. Pedetour <sup>f</sup> | WT                       | Overexpressed      |
| T1000       | DDLPS                 | Dr. Pedetour              | WT                       | Overexpressed      |
| LISA-2      | Poorly differentiated | Dr. Möller <sup>g</sup>   | Mutant<br>T926C (pL309S) | N/A                |
| SA-4        | N/A                   | N/A                       | WT                       | N/A                |

Note: <sup>a</sup>DDLPS = Dedifferentiated LPS; <sup>b</sup>WDLPS = Well-differentiated LPS; <sup>c</sup>ATCC = American Type Culture Collection; <sup>d</sup>Dr. Christopher D. M. Fletcher at Brigham and Women's Hospital (Boston, MA)<sup>1</sup>; <sup>e</sup>Dr. Hong Wu at University of California, Los Angeles (Los Angeles, CA)<sup>2</sup>; <sup>f</sup>Dr. Florence Pedetour at Nice University (Nice, France)<sup>3</sup>; <sup>g</sup>Dr. Peter Möller at University of Ulm (Ulm, Germany)<sup>4</sup>. <sup>h</sup>WT = Wild Type.



**Supplementary Table S2. Primer sets used in this study**

| Gene ID                                                               | Forward Primer Sequence<br>Reverse Primer Sequence                                                                                                                                                            | Note            |      |
|-----------------------------------------------------------------------|---------------------------------------------------------------------------------------------------------------------------------------------------------------------------------------------------------------|-----------------|------|
| <i>For quantitative reverse-transcription real-time PCR (qRT-PCR)</i> |                                                                                                                                                                                                               |                 |      |
| GAPDH                                                                 | 5' -CAGCAAGAGCACAAGAGGAA-3'<br>5' -TCTACATGGCAACTGTGAGGAG-3'                                                                                                                                                  | Loading control |      |
| HOXA5                                                                 | 5' -CCAGATCTACCCCTGGATG-3'<br>5' -ACTTCATTCTCCGGTTTTGG-3'                                                                                                                                                     |                 |      |
| TP53                                                                  | 5' -CCCAAGCAATGGATGATTTGA-3'<br>5' -GGCATTCTGGGAGCTTCATCT-3'                                                                                                                                                  |                 |      |
| FASLG                                                                 | 5' -TCTACCAGCCAGATGCACAC-3'<br>5' -TCACTCCAGAAAGCAGGACA-3'                                                                                                                                                    |                 |      |
| FAS                                                                   | 5' -TCAGTACGGAGTTGGGGAAG-3'<br>5' -CCAATCCCTTGGAGTTGATG-3'                                                                                                                                                    |                 |      |
| BAD                                                                   | 5' -GCTGACCCAGATTCCCTTC-3'<br>5' -TAAACCTGGCTCGCGACTT-3'                                                                                                                                                      |                 |      |
| <i>For cloning</i>                                                    |                                                                                                                                                                                                               |                 |      |
| HOXA5<br>3'UTR-WT <sup>a</sup>                                        | 5' -GCCGTGTAATTCTAGAGTTCTCGTTGCCCTAA<br>TTCATC-3'<br>5' -CCGCCCGACTCTAGAAGGAACACTTCCACGC<br>ACA-3'                                                                                                            |                 | pGL3 |
| HOXA5<br>3'-UTR-Mut <sup>b</sup>                                      | 5' -AATAGATGTTTTAACTTATTTATATGAAGCAA<br>GCTGTGTTTATTTAGGTAACATAACAAAAAAGAAA<br>AGAGAAAAAAAACACAC-3'<br>5' -GTGTGTTTTTTTTTCTCTTTTCTTTTTTTTGT<br>ATAGTTACCTAAATGAACACAGCTTGCTTCATATAAA<br>TAAGTTAAAACATCTATT-3' | pGL3            |      |
| HOXA5<br>CDS <sup>c</sup>                                             | 5' -CGGAATTCATGAGCTCTTATTTGTAACTC-3'<br>5' -CGGAATTCTCAGGGACGGAAGGCCCTCCT-3'                                                                                                                                  | pcDNA3.1-Flag   |      |

Note: <sup>a</sup>WT = wild type; <sup>b</sup>Seed sequence of miR-26a-2 binding site (UACUUGAA) was mutated to UCAUUUAG by site-directed mutagenesis; <sup>c</sup>CDS = coding sequence

**Supplementary Table S3. Antibodies used in this study**

| <b>Antibody</b>                       | <b>Phosphorylation Site</b> | <b>Company</b> | <b>Catalog No</b> |
|---------------------------------------|-----------------------------|----------------|-------------------|
| <i><b>For Western blotting</b></i>    |                             |                |                   |
| GAPDH                                 |                             | Santa Cruz     | sc-47724          |
| Flag                                  |                             | Sigma          | F3165             |
| phospho-p53                           | Ser15                       | Cell Signaling | 9284              |
| p53                                   |                             | Cell Signaling | 2524              |
| PARP                                  |                             | Cell Signaling | 9532              |
| CASP3                                 |                             | Cell Signaling | 9668              |
| CASP8                                 |                             | Santa Cruz     | sc-7890           |
| CASP9                                 |                             | Santa Cruz     | sc-7885           |
| phospho-RELA                          | Ser536                      | Cell Signaling | 3033              |
| RELA                                  |                             | Santa Cruz     | sc-372            |
| NFKBIA<br>(I $\kappa$ B $\alpha$ )    |                             | Santa Cruz     | sc-847            |
| HNRNPA1                               |                             | Santa Cruz     | sc-10030          |
| TUBA4A<br>( $\alpha$ -tubulin)        |                             | Santa Cruz     | sc-5286           |
| FOS                                   |                             | Santa Cruz     | sc-52             |
| TNFR1                                 |                             | R & D Systems  | MAB225            |
| TNFR2                                 |                             | Santa Cruz     | sc-8041           |
| BAX                                   |                             | Santa Cruz     | sc-493            |
| BCL2                                  |                             | Santa Cruz     | 7382              |
| Bcl-xL                                |                             | Cell Signaling | 2762              |
| CEBPA                                 |                             | Santa Cruz     | sc-9315           |
| CEBPB                                 |                             | Santa Cruz     | sc-150            |
| PPARG                                 |                             | Cell Signaling | 2243              |
| <i><b>For Immunocytochemistry</b></i> |                             |                |                   |
| RELA                                  |                             | Cell Signaling | 6956              |
| FITC-IgG                              |                             | Abnova         | PAB4971           |

## REFERENCES TO SUPPLEMENTARY INFORMATION

- 1 Snyder, E. L. *et al.* c-Jun amplification and overexpression are oncogenic in liposarcoma but not always sufficient to inhibit the adipocytic differentiation programme. *J Pathol* **218**, 292-300, doi:10.1002/path.2564 (2009).
- 2 Smith, K. B. *et al.* Novel dedifferentiated liposarcoma xenograft models reveal PTEN down-regulation as a malignant signature and response to PI3K pathway inhibition. *Am J Pathol* **182**, 1400-1411, doi:10.1016/j.ajpath.2013.01.002 (2013).
- 3 Pedeutour, F. *et al.* Structure of the supernumerary ring and giant rod chromosomes in adipose tissue tumors. *Genes Chromosomes Cancer* **24**, 30-41 (1999).
- 4 Wabitsch, M. *et al.* LiSa-2, a novel human liposarcoma cell line with a high capacity for terminal adipose differentiation. *Int J Cancer* **88**, 889-894 (2000).
